# Supplementary material
Source: Research Square preprint supplement (doi:10.21203/rs.3.rs-9614453/v1)
Supplement: Supplementary file 1 [file 356f038595b69b60b6df1c08.docx]

**Semi-structured Interview Guide**

**Study title: Establishing an Australian pathway to accreditation and clinical reporting for Polygenic Scores (PGS)**

**Introductory script**

- Thank you for agreeing to take part in this study.
- The purpose of this interview is to obtain your expert views on challenges and barriers to clinical accreditation of PGS
- My role is to step through different aspects of the PGS process and raise particular points for discussion. You can opt to address these points, or speak to any aspect which you feel is of importance, or request to move on to the next discussion topic.
- As noted in the Participant Information Sheet, the interview will be recorded. You may stop the interview at any time.
- Your confidentiality will be maintained with only the Chief Investigator and Study Coordinators having access to the recordings and study code identifiers.
- The interview will take approximately 30-45mins.
- Do you consent to participate in the study?
- Do you have any questions before we begin?

**Background**

Work is being carried out to develop PGS and translate their use into standard clinical care. The aim of this project is to identify the challenges and barriers to clinical accreditation of PGS so that we can be better prepared to implement this change in healthcare.

**Experience with clinical accreditation of genetic tests and/or PGS**

1. For the record, could you please tell me a little about your expertise with genetic testing and/or PGS and clinical accreditation?

**PGS test pipeline**

There are many steps involved in PGS test pipelines and you can see these set out in the PGS Test Pipeline Figure (figure shared on screen or, if interview by telephone, emailed in advance). Based on your expertise, there are specific components on which I would like to focus today. [*Discussion components to be tailored to the participant’s expertise from the PGS test pipeline steps below. Possible discussion triggers are listed under each point.*].

Some of these steps will have been approved previously as part of other testing processes e.g., array accreditation. We are interested in the extent to which PGS adds another dimension to any of these steps. As we go through them, could you please highlight any PGS specific considerations?

*PGS test pipeline:*

1. Test sample collection – NATA-accreditable process
   1. The standard pathway would involve starting with either a fresh DNA extraction or stored DNA sample. What existing genomic data, if any, would you consider as a suitable starting point for generating a PGS?
2. Generate SNP data – NATA-accreditable process
   1. This is a standard NATA accreditable process which usually involves microarray data but can include genomic sequencing data. Do you feel that either of these is preferable when generating a PGS?
   2. Have you any thoughts regarding standards which should be run?
   3. Do you think a set of Australian standard samples would be beneficial?
3. Generate called genotype – Cluster files
   1. Do you think that data clustering will differ for PGS as compared to a standard array?
   2. Generally, cluster files with data from a greater number of individuals are of higher quality. Do you think this will be an issue for PGS?
4. Genotype QC
   1. Again, as per arrays, genotype QC is an important step of the process. Do you have a standard minimum pass rate?
   2. Do you think PGS adds any additional considerations?
5. Imputation – PGS-specific process
   1. When generating PGS in a research context, imputation is common. Are you aware of a clinical context in which you have or might use imputation?
   2. What might be the implications of using imputation for a NATA accredited test?
   3. Any other considerations I haven’t mentioned?
6. PGS algorithm generation and validation – PGS-specific process
   1. This is obviously a new area for most clinical laboratories. How might a clinical laboratory go about creating or identifying a suitable algorithm?
   2. Would in-house validation of that algorithm be required and, if so, what would that entail?
   3. Any other considerations?
7. PGS Score validation – PGS-specific process
   1. Once a PGS score has been calculated using the algorithm, what validation steps might be necessary?
   2. Would data from Australian Standard samples be valuable/necessary?
   3. Any other considerations?
8. Generate PGS result – PGS-specific process
   1. Have you thought about how you might report results eg as absolute risks or risk ranges?
   2. What types of references ranges might you use?
   3. How might the number of samples genotyped on that run affect those ranges?
   4. Any other considerations?
9. Prepare report – NATA-accreditable process
   1. Will the report generation process differ for a PGS as compared to an array or other genetic test? Could you explain why or why not?

**Additional considerations for implementation**

Relating to the PGS process overall, I’m interested in your thoughts around additional issues surrounding PGS accreditation.

What are your thoughts and/or insights regarding:

1. Potential to build a repository of cluster files for wide use.
2. Developing an Australian set of reference samples.
3. Compiling a registry of PGS experts for NATA to draw on for accreditation processes.

**Final thoughts**

Is there anything else around PGS accreditation that we have not discussed that you think we should consider?

**Interview debriefing and closure script**

- I have no further questions. Is there anything else you would like to bring up, or ask about, before we finish the interview?
- Do you still have the contact details in case you would like to contact us in the future?
- Are you interested in contributing to the resulting manuscript as a co-author?
  - If not, would you like a copy of any reports or publications?
- **Thank you for sharing your expertise.**
